# Supplementary material
Source: MDPI journal article supplement (https://www.mdpi.com/2673-3986/4/1/10)
Supplement: s1 [file s1]

Table S1: Trends in CAM use Among US Adults with active asthma, 2008 through 2019 by Age, Sex, Race, Income, Daytime and Nighttime symptoms

|                        | ACBS<br>2008<br>(%)* | 2009<br>(%)* | ACBS<br>(%)* | ACBS<br>2011<br>(%)* | ACBS<br>2012(%)* | ACBS<br>2013(%)* | ACBS<br>2014(%)* | ACBS<br>2015(%)* | ACBS<br>2016(%)* | ACBS<br>2017(%)* | ACBS<br>2018(%)* | ACBS<br>2019(%)* | P-trend | 2019 vs 2008     |                     |
|------------------------|----------------------|--------------|--------------|----------------------|------------------|------------------|------------------|------------------|------------------|------------------|------------------|------------------|---------|------------------|---------------------|
| Ever use of CAM        |                      |              |              |                      |                  |                  |                  |                  |                  |                  |                  |                  |         | Prevalence Ratio | Difference (%)      |
| <b>Day symptoms</b>    |                      |              |              |                      |                  |                  |                  |                  |                  |                  |                  |                  |         |                  |                     |
| ≤2 days/week           | 48.37                | 47.14        | 46.61        | 51.67                | 54.01            | 49.71            | 51.68            | 57.93            | 55.12            | 55.91            | 55.81            | 58.2             | 0.011   | 1.20(1.02-1.39)  | 9.82(1.34-18.31)    |
| >2 days/ week          | 48.87                | 45.21        | 47.15        | 48.09                | 48.79            | 51.23            | 46.33            | 52.23            | 50.37            | 56.07            | 52.16            | 59.09            | <.0001  | 1.21(1.08-1.33)  | 10.21(4.61-15.82)   |
| Throughout the day     | 37.01                | 37.21        | 35.53        | 39.95                | 40.51            | 37.32            | 38.13            | 38.26            | 39.57            | 41.88            | 46.38            | 42.75            | 0.0003  | 1.16(1.04-1.27)  | 5.74(1.74-9.74)     |
| <b>Night symptoms</b>  |                      |              |              |                      |                  |                  |                  |                  |                  |                  |                  |                  |         |                  |                     |
| ≤2 times/ month        | 56.99                | 51.04        | 49.09        | 53.02                | 51.65            | 53.98            | 56.78            | 61.84            | 56.2             | 61.73            | 67.74            | 59.19            | 0.0001  | 1.04(0.85-1.23)  | 2.20(-8.68 -13.08)  |
| 1–3 times/ week        | 51.28                | 49.01        | 52.97        | 53.22                | 50.9             | 53.8             | 53.18            | 56.15            | 52.96            | 58.05            | 57.02            | 65.46            | 0.0031  | 1.28(1.11-1.44)  | 14.18 (6.83-21.54)  |
| ≥4 times/week          | 37.32                | 37.61        | 35.54        | 40.51                | 41.6             | 38.29            | 37.32            | 39.79            | 40.5             | 43.07            | 45.09            | 43.94            | <.0001  | 1.18(1.08-1.28)  | 6.61(3.08-10.15)    |
| <b>Age</b>             |                      |              |              |                      |                  |                  |                  |                  |                  |                  |                  |                  |         |                  |                     |
| 18-55 Years            | 43.49                | 41.77        | 40.78        | 45.35                | 46.44            | 45.56            | 46.63            | 47.04            | 46.69            | 51.32            | 53.4             | 51.75            | <.0001  | 1.19(1.08-1.30)  | 8.25 (3.71-12.80)   |
| >55 Years              | 37.89                | 37.3         | 37.27        | 39.01                | 35.45            | 34.92            | 37.26            | 37.82            | 38.58            | 39.18            | 40.6             | 41.64            | 0.007   | 1.10(0.99-1.20)  | 3.75(0.022-7.47)    |
| <b>Gender</b>          |                      |              |              |                      |                  |                  |                  |                  |                  |                  |                  |                  |         |                  |                     |
| Female                 | 42.8                 | 43.78        | 43.55        | 44.93                | 45.78            | 44.72            | 43.47            | 46.03            | 46.56            | 50.93            | 50.99            | 52.58            | <.0001  | 1.23(1.14-1.32)  | 9.78(6.17-13.39)    |
| Male                   | 38.73                | 34.45        | 32.33        | 40.59                | 40.32            | 36.94            | 37.77            | 39.67            | 38.3             | 38.88            | 43.95            | 40.03            | 0.0022  | 1.03(0.89-1.18)  | 1.3(-4.23 - 6.8)    |
| <b>Income</b>          |                      |              |              |                      |                  |                  |                  |                  |                  |                  |                  |                  |         |                  |                     |
| >\$25000               | 39.77                | 38.46        | 36.69        | 39.99                | 45.37            | 40.13            | 37.54            | 40.97            | 40.62            | 42.99            | 47.02            | 44.93            | <.0001  | 1.13(1.03-1.23)  | 1.99(1.26-9.05)     |
| <\$25,000              | 45.17                | 46.89        | 44.61        | 46.56                | 43.21            | 44.32            | 49.5             | 50.9             | 47.67            | 51.37            | 50.57            | 53.51            | 0.0428  | 1.18(0.99-1.38)  | 8.34(0.35-16.3)     |
| <b>Race</b>            |                      |              |              |                      |                  |                  |                  |                  |                  |                  |                  |                  |         |                  |                     |
| White Non-Hispanic     | 39.37                | 37.59        | 38.19        | 41.1                 | 40.93            | 41.92            | 39.34            | 42.45            | 42.06            | 44.89            | 45.64            | 46.04            | <.0001  | 1.17(1.08-1.26)  | 6.67(3.47-9.86)     |
| Black Non-Hispanic     | 52.86                | 47.64        | 38.76        | 44.14                | 46.76            | 41.03            | 46.02            | 41.31            | 40.75            | 46.36            | 55.6             | 48.88            | 0.0163  | 0.92(0.70-1.15)  | -3.98 (-16.21-8.24) |
| Multiracial/other race | 54.75                | 47.21        | 49           | 47.65                | 50.09            | 48.1             | 53.1             | 56.89            | 47.06            | 48.79            | 56.55            | 55.32            | 0.0611  | 1.01(0.78 -1.24) | 0.56(-11.97 -13.09) |
| Hispanic               | 35.13                | 53.02        | 42.74        | 49.96                | 48.04            | 40.44            | 42.55            | 46.31            | 47.42            | 51.12            | 51.74            | 52.79            | 0.4978  | 1.50(1.09-1.91)  | 17.66(6.48 -28.85)  |
|                        |                      |              |              |                      |                  |                  |                  |                  |                  |                  |                  |                  |         |                  |                     |
| <b>Use of herbs</b>    |                      |              |              |                      |                  |                  |                  |                  |                  |                  |                  |                  |         |                  |                     |
| <b>Day symptoms</b>    |                      |              |              |                      |                  |                  |                  |                  |                  |                  |                  |                  |         |                  |                     |
| ≤2 days/week           | 10.09                | 7.87         | 6.61         | 9.35                 | 11.31            | 7.05             | 11.32            | 7.03             | 10.47            | 10.61            | 12.31            | 10.36            | 0.0511  | 1.03(0.57-1.48)  | 0.27(-4.27 -4.81)   |
| >2 days/ week          | 8.74                 | 7.15         | 6.34         | 8.22                 | 7.47             | 7.4              | 8.05             | 7.99             | 9.1              | 11.36            | 7.83             | 12.32            | 0.0025  | 1.41(0.89-1.93)  | 3.59(-0.50 -7.67)   |
| Throughout the day     | 4.97                 | 4.69         | 5.39         | 6.51                 | 5.51             | 4.97             | 5.59             | 5.73             | 6.43             | 5.41             | 6.77             | 6.27             | 0.2996  | 1.26(0.78-1.74)  | 1.30(-0.78-3.38)    |
| <b>Night symptom</b>   |                      |              |              |                      |                  |                  |                  |                  |                  |                  |                  |                  |         |                  |                     |
| ≤2 times/ month        | 12.13                | 10.57        | 6.82         | 7.67                 | 15.66            | 11.97            | 13.3             | 12.39            | 12.3             | 15.03            | 12.73            | 11.8             | 0.0549  | 0.97(0.45 -1.50) | -0.34(-6.77 - 6.10) |

|                        |       |      |       |       |      |       |       |       |       |       |       |       |        |                   |                      |
|------------------------|-------|------|-------|-------|------|-------|-------|-------|-------|-------|-------|-------|--------|-------------------|----------------------|
| 1-3 times/ week        | 9.87  | 7.33 | 10.53 | 10.49 | 7.48 | 9.65  | 10.61 | 9.2   | 11.03 | 11.44 | 11.07 | 17.69 | 0.0055 | 1.79(1.06-2.52)   | 7.82(1.99-13.64)     |
| ≥4 times/week          | 5.19  | 4.91 | 4.64  | 6.45  | 5.37 | 4.33  | 5.46  | 5.39  | 6.38  | 6.05  | 6.19  | 6     | 0.0952 | 1.16(0.77-1.54)   | 0.82(-1.02 - 2.65)   |
| <b>Age</b>             |       |      |       |       |      |       |       |       |       |       |       |       |        |                   |                      |
| 18-55 Years            | 7.28  | 6.55 | 6.34  | 8.05  | 6.39 | 5.72  | 7.03  | 6.78  | 7.52  | 8.4   | 8.13  | 9     | 0.0181 | 1.24(0.83 -1.64)  | 1.72(-0.90 -4.34)    |
| >55 Years              | 5.71  | 4.6  | 5.1   | 5.56  | 5.68 | 4.23  | 5.34  | 5.77  | 7.36  | 5.8   | 6.44  | 6.49  | 0.0127 | 1.14 (0.77-1.50)  | 0.77(-1.19 -2.74)    |
| <b>Gender</b>          |       |      |       |       |      |       |       |       |       |       |       |       |        |                   |                      |
| Female                 | 6.59  | 6.06 | 6.64  | 7.08  | 6.23 | 5.75  | 6.89  | 7.35  | 7.49  | 8.38  | 6.81  | 9.39  | 0.0052 | 1.43(1.06-1.79)   | 2.81(0.67-4.94)      |
| Male                   | 6.22  | 5.13 | 4.07  | 7.41  | 7.07 | 5.61  | 6.67  | 4.73  | 7.4   | 5.62  | 8.71  | 5.75  | 0.1656 | 0.92(0.48-1.37)   | -0.47(-3.41 -2.47)   |
| <b>Income</b>          |       |      |       |       |      |       |       |       |       |       |       |       |        |                   |                      |
| >\$25000               | 5.73  | 5.06 | 5.15  | 6.03  | 6.36 | 4.53  | 5.26  | 4.49  | 5.74  | 6.21  | 5.9   | 6.57  | 0.1655 | 1.15(0.83-1.47)   | 0.84(-0.87-2.56)     |
| <\$25,000              | 7.27  | 8.48 | 8.65  | 9.21  | 7.33 | 9.6   | 9.01  | 10.64 | 11.3  | 11.36 | 9.43  | 11.97 | 0.2776 | 1.65(0.85-2.45)   | 4.70 (-0.52 -9.91)   |
| <b>Race</b>            |       |      |       |       |      |       |       |       |       |       |       |       |        |                   |                      |
| White Non-Hispanic     | 5.75  | 4.77 | 4.35  | 4.83  | 6.44 | 4.75  | 5.41  | 4.52  | 4.93  | 5.42  | 5.03  | 6.73  | <.0001 | 1.17(0.85-1.49)   | 0.98(-0.76 - 2.73)   |
| Black Non-Hispanic     | 5.04  | 7.05 | 7.19  | 8.78  | 6.96 | 4.17  | 7.83  | 8.77  | 9.7   | 9.52  | 10.25 | 8.93  | 0.0171 | 1.77(0.49 - 3.05) | 3.89(-1.11 - 8.88)   |
| Multiracial/other race | 18.09 | 8.03 | 8.14  | 10.54 | 9.05 | 5.26  | 11.05 | 14.4  | 8.52  | 6.29  | 12.46 | 10.23 | 0.0666 | 0.57(0.12 -1.01)  | -7.87(-19.54 - 3.81) |
| Hispanic               | 5     | 9.91 | 12.42 | 15.09 | 5.29 | 11.49 | 12.74 | 11.3  | 16.84 | 13.74 | 14.87 | 12.42 | 0.4613 | 2.48(0.90 -4.06)  | 7.41(2.37-12.45)     |
|                        |       |      |       |       |      |       |       |       |       |       |       |       |        |                   |                      |
| <b>Aromatherapy</b>    |       |      |       |       |      |       |       |       |       |       |       |       |        |                   |                      |
| <b>Day symptoms</b>    |       |      |       |       |      |       |       |       |       |       |       |       |        |                   |                      |
| ≤2 days/week           | 3.56  | 5.41 | 6.02  | 6.02  | 4.53 | 5.64  | 7.11  | 6.04  | 9.46  | 11.41 | 11.2  | 12.92 | 0.0173 | 3.63(1.08-6.18)   | 9.36(2.68-16.05)     |
| >2 days/ week          | 6.19  | 5.12 | 5.36  | 7.12  | 5.89 | 5.92  | 6.99  | 9.77  | 10.62 | 11.33 | 14.03 | 13.77 | <.0001 | 2.22(1.47-2.97)   | 7.58(4.23-10.93)     |
| Throughout the day     | 4.57  | 4.75 | 4.6   | 4.83  | 6.32 | 4.78  | 4.74  | 5.08  | 8.54  | 7.94  | 10.71 | 9.32  | <.0001 | 2.04(1.23 - 2.85) | 4.75(2.3 - 7.2)      |
| <b>Night symptoms</b>  |       |      |       |       |      |       |       |       |       |       |       |       |        |                   |                      |
| ≤2 times/ month        | 11.01 | 9.29 | 7.61  | 7.91  | 7.89 | 6.31  | 6.51  | 8.41  | 12.61 | 14.08 | 20.89 | 8.65  | 0.0048 | 0.79(0.33-1.24)   | -2.37(-8.14 - 3.41)  |
| 1-3 times/ week        | 4.27  | 7.78 | 7.76  | 8.55  | 7.51 | 8.91  | 8.86  | 8.08  | 12.1  | 12.75 | 13.6  | 14.63 | 0.1227 | 3.42(1.92-4.92)   | 10.36(6.18-14.53)    |
| ≥4 times/week          | 4.45  | 3.83 | 4.02  | 4.78  | 5.56 | 4.23  | 4.73  | 5.79  | 8.25  | 8.03  | 10.49 | 10.14 | <.0001 | 2.28(1.48 - 3.08) | 5.69(3.4-7.97)       |
| <b>Age</b>             |       |      |       |       |      |       |       |       |       |       |       |       |        |                   |                      |
| 18-55 Years            | 6.21  | 5.98 | 5.7   | 6.59  | 7.41 | 5.97  | 6.78  | 7.43  | 11.22 | 11.13 | 14.21 | 12.81 | <.0001 | 2.06(1.36-2.76)   | 6.66(3.63-9.58)      |
| >55 Years              | 2.48  | 3.19 | 3.56  | 3.54  | 4.36 | 3.32  | 2.97  | 4.28  | 5.74  | 5.93  | 7.12  | 7.02  | 0.0009 | 2.83(1.67-4.00)   | 4.55(2.94-6.15)      |
| <b>Gender</b>          |       |      |       |       |      |       |       |       |       |       |       |       |        |                   |                      |
| Female                 | 5.28  | 6.48 | 5.57  | 5.45  | 6.55 | 6.05  | 6.08  | 7.43  | 11.6  | 11.38 | 13.69 | 13.86 | <.0001 | 2.62(1.98-3.27)   | 8.58(6.07-11.08)     |
| Male                   | 4.17  | 2    | 3.69  | 5.75  | 5.13 | 3.26  | 4.42  | 4.24  | 4.73  | 5.07  | 7.48  | 5.11  | 0.0066 | 1.23(0.44-2.01)   | 0.94(-1.86-3.74)     |
| <b>Income</b>          |       |      |       |       |      |       |       |       |       |       |       |       |        |                   |                      |
| >\$25000               | 4.11  | 4.1  | 4.15  | 4.51  | 5.3  | 5.75  | 4.97  | 6.12  | 8.69  | 8.93  | 12.91 | 10.66 | <.0001 | 2.59(1.87-3.32)   | 6.55(4.49-8.62)      |
| <\$25,000              | 5.05  | 7.25 | 7.63  | 6.38  | 8.12 | 6.22  | 5.36  | 9.22  | 7.96  | 10.26 | 10.19 | 8.37  | 0.5498 | 1.66(0.80-2.52)   | 3.33(-0.36 - 7.01)   |

|                            |       |       |       |       |       |       |       |       |       |       |       |       |        |                  |                      |
|----------------------------|-------|-------|-------|-------|-------|-------|-------|-------|-------|-------|-------|-------|--------|------------------|----------------------|
| <b>Race</b>                |       |       |       |       |       |       |       |       |       |       |       |       |        |                  |                      |
| White Non-Hispanic         | 4.3   | 3.92  | 4.29  | 4.82  | 5.64  | 5     | 5.41  | 5.48  | 9.1   | 8.92  | 11.28 | 11.04 | <.0001 | 2.57(1.89-3.24)  | 6.74(4.64-8.84)      |
| Black Non-Hispanic         | 5.47  | 9.87  | 6.31  | 3.8   | 8.91  | 4.41  | 5.48  | 4.98  | 4.9   | 6.31  | 7.31  | 6.55  | 0.636  | 1.20(0.20-2.20)  | 1.07(-3.94 - 6.09)   |
| Multiracial/other race     | 14.65 | 5.72  | 9.12  | 7.31  | 5.73  | 5.65  | 7.35  | 7.67  | 8.88  | 9.04  | 17.86 | 11.93 | 0.0004 | 0.81(0.15-1.47)  | -2.72(-14.07 - 8.63) |
| Hispanic                   | 2.8   | 6.45  | 4.75  | 9.78  | 6.79  | 5.48  | 5.54  | 11.62 | 9.91  | 9.43  | 14.4  | 10.24 | 0.4036 | 3.66(1.17-6.15)  | 7.44(2.66-12.22)     |
|                            |       |       |       |       |       |       |       |       |       |       |       |       |        |                  |                      |
| <b>Yoga</b>                |       |       |       |       |       |       |       |       |       |       |       |       |        |                  |                      |
| <b>Day symptoms</b>        |       |       |       |       |       |       |       |       |       |       |       |       |        |                  |                      |
| ≤2 days/week               | 3.52  | 3.81  | 4.9   | 6.73  | 6.9   | 2.94  | 4.57  | 5.11  | 5.14  | 4.54  | 11.31 | 6.83  | 0.4274 | 1.94(0.35-3.53)  | 3.31(-1.06 -7.69)    |
| >2 days/ week              | 6.08  | 5.14  | 4.26  | 7.4   | 6.68  | 10.66 | 5.76  | 5.33  | 8.51  | 7.3   | 8.54  | 9.66  | 0.0169 | 1.59(0.83-2.34)  | 3.57(-0.42-7.57)     |
| Throughout the day         | 3.99  | 5     | 4.18  | 5.26  | 6.12  | 5.44  | 4.88  | 5.13  | 6.08  | 6.19  | 7.78  | 6.66  | 0.1088 | 1.67(1.05 -2.29) | 2.67(0.52(4.82)      |
| <b>Night symptoms</b>      |       |       |       |       |       |       |       |       |       |       |       |       |        |                  |                      |
| ≤2 times/ month            | 6.78  | 5.78  | 3.3   | 5.11  | 4.71  | 7.42  | 5.16  | 8.66  | 5.3   | 7.1   | 10.34 | 10.29 | 0.0061 | 1.52(0.35-2.68)  | 3.51(-3.32 -10.33)   |
| 1–3 times/ week            | 6.41  | 6.32  | 6.24  | 6.46  | 5.22  | 8.37  | 7.38  | 4.99  | 9.14  | 6.69  | 9.5   | 11.77 | 0.0567 | 1.84(0.81-2.86)  | 5.36(-0.21 -10.93)   |
| ≥4 times/week              | 3.95  | 4.53  | 4.03  | 6.07  | 6.73  | 6.27  | 4.65  | 4.92  | 6.25  | 6.19  | 7.93  | 6.43  | 0.1379 | 1.63(1.06-2.20)  | 2.49(0.55-4.42)      |
| <b>Age</b>                 |       |       |       |       |       |       |       |       |       |       |       |       |        |                  |                      |
| 18-55 Years                | 5.01  | 5.03  | 4.94  | 7.51  | 8.18  | 8.81  | 6.24  | 5.84  | 7.57  | 7.65  | 10.39 | 9.83  | 0.0135 | 1.96(1.29-2.63)  | 4.81(2.11-7.52)      |
| >55 Years                  | 3.44  | 2.31  | 3.23  | 2.77  | 3.56  | 3.35  | 2.6   | 3.87  | 4.92  | 4.12  | 4.65  | 3.21  | 0.0035 | 0.93(0.54-1.33)  | -0.23(-1.65-1.20)    |
| <b>Gender</b>              |       |       |       |       |       |       |       |       |       |       |       |       |        |                  |                      |
| Female                     | 5.3   | 6.14  | 5.28  | 7.21  | 8.01  | 7.89  | 6.07  | 5.84  | 7.12  | 7.2   | 10.17 | 9.62  | 0.0361 | 1.82(1.26-2.37)  | 4.32(1.8-6.84)       |
| Male                       | 3.26  | 2.46  | 2.39  | 3.84  | 3.2   | 4.13  | 3.3   | 3.87  | 5.56  | 4.64  | 4.57  | 3.42  | 0.0481 | 1.05(0.43-1.67)  | 0.16(-1.81-2.13)     |
| <b>Income</b>              |       |       |       |       |       |       |       |       |       |       |       |       |        |                  |                      |
| >\$25000                   | 4.61  | 4.83  | 4.07  | 5.46  | 6.57  | 7.45  | 4.83  | 4.8   | 6.57  | 6.63  | 8.52  | 6.84  | 0.0236 | 1.48(0.93-2.03)  | 2.23(-0.04-4.49)     |
| ≤\$25,000                  | 4.16  | 6.07  | 5.37  | 6.12  | 5.56  | 6.04  | 5.79  | 6.59  | 6.51  | 5.17  | 7.97  | 7.7   | 0.8746 | 1.85(0.55-3.16)  | 3.55(-0.1-8.05)      |
| <b>Race</b>                |       |       |       |       |       |       |       |       |       |       |       |       |        |                  |                      |
| White Non-Hispanic         | 4.31  | 4.38  | 4.13  | 5.92  | 6.21  | 7.14  | 5.08  | 4.55  | 5.96  | 6.6   | 7.06  | 6.93  | 0.0421 | 1.61(1.10-2.11)  | 2.61(0.76-4.46)      |
| Black Non-Hispanic         | 2.45  | 5.68  | 3.92  | 3.98  | 5.67  | 5.39  | 4.59  | 5.19  | 6.51  | 3.26  | 9.61  | 10.86 | 0.6097 | 4.44(0.92-9.79)  | 8.41(-2.19 - 19.01)  |
| Multiracial/other race     | 10.85 | 9.18  | 5.74  | 5.96  | 5.86  | 5.26  | 6.74  | 5.49  | 10.67 | 7.7   | 15    | 9.57  | 0.0301 | 0.88(0.20-1.57)  | -1.28(-9.1 -6.54)    |
| Hispanic                   | 4.8   | 5.33  | 5.05  | 7.97  | 7.81  | 4.86  | 4.56  | 7.28  | 6.53  | 4.38  | 8.36  | 5.97  | 0.8887 | 1.24(0.14-2.35)  | 1.17(-3.53-5.88)     |
|                            |       |       |       |       |       |       |       |       |       |       |       |       |        |                  |                      |
| <b>Breathing exercises</b> |       |       |       |       |       |       |       |       |       |       |       |       |        |                  |                      |
| <b>Day symptoms</b>        |       |       |       |       |       |       |       |       |       |       |       |       |        |                  |                      |
| ≤2 days/week               | 36.8  | 39.52 | 37.09 | 42.06 | 43.12 | 39.86 | 37.46 | 48.4  | 43.35 | 45.2  | 45.11 | 45.66 | 0.165  | 1.24(0.99-1.49)  | 8.86(0.30-17.41)     |
| >2 days/ week              | 37.07 | 34.45 | 39.39 | 39.51 | 39.97 | 42.59 | 36.7  | 40.62 | 40.27 | 45.48 | 43.04 | 48.96 | 0.0009 | 1.32(1.14-1.50)  | 11.9(6.11-17.69)     |
| Throughout the day         | 28.44 | 27.16 | 27.84 | 29.23 | 31.76 | 29.8  | 28.47 | 30.31 | 28.51 | 32.03 | 35.97 | 34.21 | 0.0003 | 1.20(1.05-1.35)  | 5.77(1.83-9.71)      |



|                        |       |       |      |       |       |       |       |       |      |       |      |      |        |                  |                   |
|------------------------|-------|-------|------|-------|-------|-------|-------|-------|------|-------|------|------|--------|------------------|-------------------|
| >\$25000               | 2.1   | 2.11  | 1.98 | 2.06  | 2.29  | 2.32  | 2.21  | 2.65  | 2.75 | 2.27  | 3.9  | 3.12 | 0.0162 | 1.48(0.89-2.08)  | 1.02(-0.05-2.08)  |
| <\$25,000              | 1.9   | 2.76  | 1.91 | 1.44  | 1.65  | 0.85  | 1.7   | 3.86  | 2.85 | 4.82  | 3.23 | 5.24 | 0.0022 | 2.76(0.68-4.84)  | 3.34(0.14-6.5)    |
| <b>Race</b>            |       |       |      |       |       |       |       |       |      |       |      |      |        |                  |                   |
| White Non-Hispanic     | 2.46  | 2.01  | 2.22 | 2.03  | 2.02  | 2.19  | 2.34  | 2.72  | 2.56 | 2.49  | 3.27 | 3.67 | 0.0012 | 1.49(0.93-2.06)  | 1.21(-0.008-2.42) |
| Black Non-Hispanic     | 2.84  | 0.68  | 1.34 | 1.17  | 1.45  | 0.42  | 1.03  | 1.69  | 1.61 | 2.04  | 0.32 | 2.67 | 0.0885 | 0.94(0.14-2.03)  | -0.17(-3.35-3.02) |
| Multiracial/other race | 3.6   | 2.58  | 2.26 | 1.73  | 0.73  | 2.13  | 2.69  | 6.79  | 1.69 | 3.04  | 6.89 | 2.2  | 0.0066 | 0.61(0.13-1.09)  | -1.41(-3.66-0.84) |
| Hispanic               | 0.59  | 6.49  | 1.08 | 2.75  | 0.95  | 1.55  | 1.58  | 3.05  | 6.36 | 5.66  | 8.46 | 4.07 | 0.4592 | 6.86(1.54-15.26) | 3.48(0.71-6.25)   |
|                        |       |       |      |       |       |       |       |       |      |       |      |      |        |                  |                   |
| <b>Naturopathy</b>     |       |       |      |       |       |       |       |       |      |       |      |      |        |                  |                   |
| <b>Day symptoms</b>    |       |       |      |       |       |       |       |       |      |       |      |      |        |                  |                   |
| ≤2 days/week           | 3.52  | 1.48  | 1.69 | 2.32  | 1.23  | 2.31  | 2.81  | 2.06  | 3.38 | 4.11  | 2.24 | 2.48 | 0.0235 | 0.70(0.07-1.38)  | -0.93(-3.63-1.77) |
| >2 days/ week          | 1.86  | 1.98  | 1.32 | 1.5   | 1.74  | 2.42  | 2.3   | 1.47  | 3.21 | 2.2   | 2.27 | 3.76 | 0.0534 | 2.02(0.76-3.27)  | 1.89(-0.09-3.87)  |
| Throughout the day     | 1.19  | 1.12  | 1.32 | 1.07  | 1.86  | 1.35  | 1.49  | 1.11  | 1.64 | 1.78  | 2.53 | 1.51 | 0.0916 | 1.27(0.57-1.95)  | 0.31(-0.43-1.06)  |
| <b>Night Symptoms</b>  |       |       |      |       |       |       |       |       |      |       |      |      |        |                  |                   |
| ≤2 times/ month        | 2.91  | 1.25  | 1.99 | 2.96  | 1.19  | 4.26  | 2.58  | 4.06  | 1.85 | 4.2   | 3.07 | 4.54 | 0.0157 | 1.56(0.021-3.24) | 1.63(-2.29-5.73)  |
| 1–3 times/ week        | 3.08  | 1.47  | 1.71 | 1.04  | 1.55  | 2.15  | 3.05  | 1.57  | 4.72 | 4.11  | 3.65 | 3.52 | <.0001 | 1.14(0.08-2.21)  | 0.44(-2.74-3.61)  |
| ≥4 times/week          | 1.12  | 1.3   | 1.22 | 1.2   | 1.81  | 1.37  | 1.5   | 1.02  | 1.74 | 1.53  | 2.04 | 1.77 | 0.3036 | 1.58(0.78-2.39)  | 0.65(-0.11-1.41)  |
| <b>Age</b>             |       |       |      |       |       |       |       |       |      |       |      |      |        |                  |                   |
| 18-55 Years            | 1.78  | 1.41  | 1.4  | 1.31  | 2.13  | 2.6   | 1.52  | 1.25  | 2.47 | 2.08  | 2.7  | 2.35 | 0.0212 | 1.32(0.59-2.08)  | 0.57(-0.60-1.78)  |
| >55 Years              | 1.43  | 1.22  | 1.25 | 1.2   | 1.75  | 1.17  | 1.8   | 1.45  | 1.76 | 2.08  | 1.96 | 1.86 | 0.0202 | 1.30(0.58-1.95)  | 0.43(-0.51-1.30)  |
| <b>Gender</b>          |       |       |      |       |       |       |       |       |      |       |      |      |        |                  |                   |
| Female                 | 1.86  | 1.37  | 1.41 | 1.31  | 1.94  | 2.16  | 1.82  | 1.51  | 2.5  | 2.49  | 2.81 | 2.71 | <.0001 | 1.46(0.78-2.19)  | 0.85(-0.25-2.02)  |
| Male                   | 1.12  | 1.45  | 1.22 | 1.26  | 1.41  | 0.81  | 1.92  | 0.98  | 1.66 | 1.33  | 1.71 | 1.25 | 0.9246 | 1.12(0.28-1.84)  | 0.14(-0.82-0.96)  |
| <b>Income</b>          |       |       |      |       |       |       |       |       |      |       |      |      |        |                  |                   |
| >\$25000               | 1.11  | 1     | 1.22 | 0.63  | 1.83  | 1.99  | 1.48  | 1.01  | 2.06 | 1.62  | 2.08 | 1.73 | 0.0193 | 1.56(0.78-2.23)  | 0.62(-0.13-1.29)  |
| <\$25,000              | 2.2   | 1.7   | 2.34 | 2.08  | 1.63  | 1.16  | 2.62  | 2.23  | 2.51 | 3.05  | 2.62 | 4.92 | 0.0181 | 2.34(0.27-4.42)  | 2.82(-0.72-6.35)  |
| <b>Race</b>            |       |       |      |       |       |       |       |       |      |       |      |      |        |                  |                   |
| White Non-Hispanic     | 1.59  | 1.47  | 1.25 | 1.4   | 1.65  | 1.87  | 1.75  | 0.93  | 2.14 | 1.92  | 1.83 | 2.35 | 0.045  | 1.4890.77-2.18)  | 0.76(-0.24-1.76)  |
| Black Non-Hispanic     | 1.27  | 0.55  | 0.85 | 0.58  | 1.37  | 0.62  | 0.51  | 1.42  | 0.47 | 1.43  | 4.23 | 1.41 | 0.0263 | 1.11(0.29-2.50)  | 0.13(-1.55-1.82)  |
| Multiracial/other race | 3.49  | 1.92  | 1.89 | 2.08  | 0.88  | 1.69  | 2.5   | 3.02  | 2.24 | 2.92  | 4.6  | 1.26 | 0.1019 | 0.36(0.05-0.67)  | -2.22(-4.89-0.45) |
| Hispanic               | 0.56  | 1.52  | 1.94 | 1.08  | 2.3   | 1.31  | 3.7   | 2.74  | 3.59 | 2.06  | 2.49 | 2.15 | 0.8485 | 3.82(1.06-8.71)  | 1.59(-0.11-3.28)  |
|                        |       |       |      |       |       |       |       |       |      |       |      |      |        |                  |                   |
| <b>Vitamins</b>        |       |       |      |       |       |       |       |       |      |       |      |      |        |                  |                   |
| <b>Day symptoms</b>    |       |       |      |       |       |       |       |       |      |       |      |      |        |                  |                   |
| ≤2 days/week           | 10.16 | 14.72 | 8.33 | 11.06 | 11.01 | 10.33 | 12.28 | 10.07 | 11   | 12.42 | 11.5 | 9.28 | 0.5754 | 0.91(0.46-1.37)  | -0.88(-5.65-3.89) |

|                        |       |       |       |       |       |       |       |       |       |       |       |       |        |                   |                     |
|------------------------|-------|-------|-------|-------|-------|-------|-------|-------|-------|-------|-------|-------|--------|-------------------|---------------------|
| >2 days/ week          | 10.05 | 9.38  | 8.65  | 9.6   | 12.13 | 9     | 9.18  | 10.56 | 10.6  | 10.55 | 6.96  | 13.97 | 0.3335 | 1.39(0.90-1.87)   | 3.91(-0.53-8.36)    |
| Throughout the day     | 6.97  | 7.58  | 6.91  | 7.7   | 7.01  | 7.48  | 7.47  | 7.75  | 7.34  | 7.22  | 7.24  | 5.5   | 0.168  | 0.79(0.56-1.02)   | -1.47(-3.27-0.33)   |
| <b>Night Symptoms</b>  |       |       |       |       |       |       |       |       |       |       |       |       |        |                   |                     |
| ≤2 times/ month        | 13.19 | 14.08 | 10.78 | 12.72 | 13.11 | 16.51 | 15.08 | 15.13 | 13.45 | 17.88 | 16.25 | 10.7  | 0.6415 | 0.81(0.38-1.25)   | -2.48(-8.69-3.73)   |
| 1–3 times/ week        | 13.02 | 12.3  | 12.52 | 11.16 | 12.1  | 10.74 | 11.74 | 11.09 | 12.34 | 14.03 | 11.28 | 16.16 | 0.2573 | 1.24(0.69-1.79)   | 3.14(-3.45-9.73)    |
| ≥4 times/week          | 6.45  | 7.58  | 6.23  | 7.48  | 7.56  | 6.78  | 6.99  | 7.51  | 7.1   | 6.85  | 6.02  | 6.08  | 0.0787 | 0.94(0.69-1.20)   | -0.37(-2.05-1.31)   |
| <b>Age</b>             |       |       |       |       |       |       |       |       |       |       |       |       |        |                   |                     |
| 18-55 Years            | 7.78  | 9.39  | 7.36  | 8.38  | 10.14 | 8.57  | 8.19  | 8.23  | 7.47  | 8.68  | 6.63  | 7.86  | 0.1159 | 1.01(0.68-1.34)   | 0.09(-2.44 -2.62)   |
| >55 Years              | 9.03  | 9.28  | 8.24  | 8.73  | 6.86  | 8.67  | 8.68  | 9.46  | 10.13 | 8.48  | 8.97  | 7.72  | 0.6726 | 0.85(0.63-1.08)   | -1.32(-3.51-0.9)    |
| <b>Gender</b>          |       |       |       |       |       |       |       |       |       |       |       |       |        |                   |                     |
| Female                 | 8.41  | 9.48  | 8.05  | 8.51  | 9.03  | 9.19  | 8.44  | 8.86  | 9.42  | 8.64  | 7.28  | 9.25  | 0.5347 | 1.10(0.82-1.38)   | 0.84(-1.45 -3.130   |
| Male                   | 7.49  | 7.74  | 6.69  | 8.5   | 8.12  | 6.07  | 8.3   | 8.34  | 6.83  | 8.53  | 7.96  | 5.36  | 0.4862 | 0.72(0.44-0.99)   | -2.13(-4.63 - 0.37) |
| <b>Income</b>          |       |       |       |       |       |       |       |       |       |       |       |       |        |                   |                     |
| >\$25000               | 7.57  | 7.36  | 7.07  | 6.79  | 9.24  | 7.03  | 6.35  | 7.51  | 7.88  | 7.5   | 6.37  | 6.34  | 0.4764 | 0.84(0.61-1.07)   | -1.22(-3.11(0.66)   |
| ≤\$25,000              | 9.16  | 14.08 | 10.72 | 11.42 | 6.89  | 9.54  | 10.97 | 12.15 | 9.84  | 12.98 | 9.25  | 9.56  | 0.3052 | 1.04(0.52-1.56)   | 0.39(-4.29 -5.08)   |
| <b>Race</b>            |       |       |       |       |       |       |       |       |       |       |       |       |        |                   |                     |
| White Non-Hispanic     | 7.23  | 7.12  | 6.51  | 7.7   | 8.27  | 8.36  | 6.66  | 7.58  | 7.56  | 7.84  | 6.43  | 8.01  | 0.8935 | 1.11(0.83-1.38)   | 0.78(-1.12-2.72)    |
| Black Non-Hispanic     | 11.75 | 12.49 | 8.91  | 10.57 | 8.65  | 6.93  | 10.68 | 6.3   | 8.92  | 7.14  | 9.02  | 6.37  | 0.3051 | 0.5420(0.19-0.89) | -5.38(-11.38 - 0.62 |
| Multiracial/other race | 12.21 | 11.05 | 9.91  | 9.29  | 8     | 8.22  | 12.34 | 13.28 | 11.08 | 8.8   | 6.65  | 7.52  | 0.7562 | 0.62(0.21-1.02)   | -4.69(-10.88-1.5)   |
| Hispanic               | 6.97  | 18.23 | 12.35 | 9.12  | 12.17 | 8.27  | 15.01 | 14.69 | 9.96  | 13.1  | 12.17 | 7.98  | 0.0246 | 1.14(0.27-2.02)   | 1.00(-4.61-6.66)    |
|                        |       |       |       |       |       |       |       |       |       |       |       |       |        |                   |                     |
| <b>Acupuncture</b>     |       |       |       |       |       |       |       |       |       |       |       |       |        |                   |                     |
| <b>Day symptoms</b>    |       |       |       |       |       |       |       |       |       |       |       |       |        |                   |                     |
| ≤2 days/week           | 2.09  | 0.95  | 0.33  | 2.29  | 0.72  | 0.91  | 1.02  | 2.1   | 2.86  | 1.12  | 7.83  | 5.34  | <.0001 | 2.56(1.05-6.17)   | 3.25(-3.12-9.62)    |
| >2 days/ week          | 1.82  | 3.21  | 1.5   | 1.96  | 1.91  | 1.87  | 0.99  | 1.23  | 1.82  | 1.65  | 2.19  | 2.62  | 0.8624 | 1.44(0.40-2.48)   | 0.80(-0.88-2.48)    |
| Throughout the day     | 1.02  | 1.91  | 1.33  | 1.42  | 1.22  | 1.69  | 1.53  | 1.02  | 1.17  | 1.14  | 1.88  | 1.59  | 0.3408 | 1.55(0.35-2.75)   | 0.56(-0.58-1.71)    |
| <b>Night Symptoms</b>  |       |       |       |       |       |       |       |       |       |       |       |       |        |                   |                     |
| ≤2 times/ month        | 2.78  | 3.29  | 0.3   | 1.42  | 1.39  | 0.85  | 1.46  | 2.34  | 3.35  | 2.02  | 8.15  | 1.7   | 0.0004 | 0.61(0.01-1.22)   | -1.1(-3.44 -1.3)    |
| 1–3 times/ week        | 2.09  | 2.56  | 1.43  | 0.68  | 1.72  | 2.16  | 1.56  | 1.34  | 1.81  | 1.94  | 4.26  | 3.14  | 0.0348 | 1.50(0.20-2.80)   | 1.05(-1.26-3.36)    |
| ≥4 times/week          | 1.03  | 1.98  | 1.34  | 1.91  | 1.29  | 1.65  | 1.27  | 1.03  | 1.27  | 1.12  | 1.63  | 2.06  | 0.2133 | 2.01(0.66-3.36)   | 1.04(-0.2-2.27)     |
| <b>Age</b>             |       |       |       |       |       |       |       |       |       |       |       |       |        |                   |                     |
| 18-55 Years            | 1.44  | 2.89  | 1.48  | 1.63  | 0.82  | 1.78  | 1.28  | 0.95  | 1.36  | 1.04  | 2.2   | 2.31  | 0.801  | 1.61(0.40-2.81)   | 0.87(-0.72 -2.46)   |
| >55 Years              | 1.46  | 1.26  | 1.09  | 1.72  | 2.06  | 1.55  | 1.76  | 1.61  | 1.65  | 1.7   | 2.83  | 1.93  | 0.0873 | 1.32(0.56-2.09)   | 0.47(-0.51 -1.46)   |
| <b>Gender</b>          |       |       |       |       |       |       |       |       |       |       |       |       |        |                   |                     |
| Female                 | 1.56  | 2.6   | 1.68  | 2.23  | 1.27  | 2.18  | 1.25  | 1.23  | 1.65  | 1.64  | 2.83  | 2.75  | 0.8369 | 1.76(0.79-2.73)   | 1.19(-0.18-2.55)    |

|                        |      |      |      |      |      |      |      |      |      |      |      |      |        |                  |                   |
|------------------------|------|------|------|------|------|------|------|------|------|------|------|------|--------|------------------|-------------------|
| Male                   | 0.93 | 1.28 | 0.5  | 0.62 | 1.5  | 0.62 | 1.48 | 1.08 | 1.15 | 0.68 | 1.74 | 1.17 | 0.3421 | 1.26(0.52-3.05)  | 0.25(-1.34-1.83)  |
| Income                 |      |      |      |      |      |      |      |      |      |      |      |      |        |                  |                   |
| >\$25000               | 1.57 | 2.46 | 1.46 | 2.16 | 1.72 | 2.13 | 1.49 | 1.3  | 1.66 | 1.55 | 2.22 | 2.43 | 0.7503 | 1.55(0.58-2.52)  | 0.86(-0.53-2.26)  |
| <\$25,000              | 0.95 | 1.28 | 1.08 | 1.58 | 0.48 | 1.58 | 0.61 | 1.5  | 1.24 | 0.88 | 4.72 | 1.46 | 0.2983 | 1.54(0.14-2.94)  | 0.51(-0.60-1.62)  |
| Race                   |      |      |      |      |      |      |      |      |      |      |      |      |        |                  |                   |
| White Non-Hispanic     | 1.27 | 1.79 | 1.32 | 1.84 | 1.43 | 1.93 | 1.27 | 0.93 | 1.5  | 1.32 | 1.61 | 1.86 | 0.4773 | 1.46(0.65-2.28)  | 0.59(-0.35-1.53)  |
| Black Non-Hispanic     | 0.09 | 2.58 | 0.7  | 1.72 | 1.8  | 1.09 | 1.79 | 1.1  | 0.87 | 0.53 | 1.89 | 0.5  | 0.0004 | 5.47(3.70-14.64) | 0.41(-0.19-1.00)  |
| Multiracial/other race | 2.86 | 2.96 | 0.79 | 1.96 | 0.48 | 1.02 | 1.18 | 1.7  | 2.02 | 1.91 | 5.96 | 5.22 | 0.0116 | 1.83(1.28-4.93)  | 2.36(-5.72-10.44) |
| Hispanic               | 1.87 | 3.86 | 1.68 | 0.6  | 0.79 | 0.92 | 1.21 | 2.58 | 1.59 | 0.9  | 5.52 | 3    | 0.167  | 1.61(0.74-3.95)  | 1.13(-2.84-5.10)  |
|                        |      |      |      |      |      |      |      |      |      |      |      |      |        |                  |                   |
| Acupressure            |      |      |      |      |      |      |      |      |      |      |      |      |        |                  |                   |
| Day symptoms           |      |      |      |      |      |      |      |      |      |      |      |      |        |                  |                   |
| ≤2 days/week           | 2.63 | 1.46 | 1.94 | 1.11 | 1.86 | 1.36 | 0.74 | 0.79 | 2.12 | 3.22 | 3.63 | 3.4  | 0.0065 | 1.28(0.15-2.70)  | 0.74(-2.75-4.23)  |
| >2 days/ week          | 1.7  | 2.45 | 1.62 | 2.17 | 2    | 0.62 | 1.23 | 1.36 | 1.85 | 2.66 | 2.77 | 2.34 | 0.3882 | 1.37(0.30-2.45)  | 0.64(-1.08-2.36)  |
| Throughout the day     | 1.19 | 1.23 | 0.96 | 0.93 | 1.38 | 1.22 | 0.8  | 1.75 | 1.11 | 1.49 | 1.14 | 0.75 | 0.9594 | 0.63(0.25-1.019) | -0.44(-1.07-0.20) |
| Night Symptoms         |      |      |      |      |      |      |      |      |      |      |      |      |        |                  |                   |
| ≤2 times/ month        | 2.32 | 2.87 | 1.86 | 2.81 | 1.48 | 0.92 | 1.1  | 1.82 | 1.91 | 3.9  | 5.51 | 2.03 | 0.3364 | 0.88(0.30-2.06)  | -0.28(-3.11-2.54) |
| 1-3 times/ week        | 2.47 | 2.66 | 2.31 | 1.42 | 1.88 | 0.81 | 1.8  | 1.6  | 1.77 | 3.56 | 4.62 | 3.36 | 0.0568 | 1.36(0.08-2.63)  | 0.88(-2.01-3.77)  |
| ≥4 times/week          | 1.13 | 1.23 | 0.95 | 1.13 | 1.54 | 1.14 | 0.69 | 1.5  | 1.24 | 1.48 | 0.94 | 0.99 | 0.8213 | 0.87(0.37-1.38)  | -0.14(-0.76-0.47) |
| Age                    |      |      |      |      |      |      |      |      |      |      |      |      |        |                  |                   |
| 18-55 Years            | 1.58 | 2    | 1.46 | 1.28 | 1.35 | 0.96 | 0.63 | 1.76 | 1.27 | 2.2  | 1.39 | 1.26 | 0.8665 | 0.80(0.26-1.34)  | -0.32(-1.27-0.63) |
| >55 Years              | 1.4  | 0.8  | 1.05 | 1.21 | 1.09 | 1.3  | 1.26 | 1.1  | 1.54 | 1.49 | 2.32 | 1.57 | 0.0019 | 1.12(0.45-1.80)  | 0.17(-0.74-1.08)  |
| Gender                 |      |      |      |      |      |      |      |      |      |      |      |      |        |                  |                   |
| Female                 | 1.38 | 1.96 | 1.54 | 1.45 | 1.62 | 1.18 | 0.97 | 1.3  | 1.59 | 2.38 | 2.2  | 1.79 | 0.4244 | 1.30(0.64-1.96)  | 0.41(-0.44-1.26)  |
| Male                   | 1.63 | 0.83 | 0.69 | 0.99 | 1.47 | 0.89 | 0.76 | 1.94 | 0.99 | 1.12 | 0.92 | 0.67 | 0.4304 | 0.41(0.07-0.75)  | -0.96(-2.01-0.01) |
| Income                 |      |      |      |      |      |      |      |      |      |      |      |      |        |                  |                   |
| >\$25000               | 1.49 | 1.7  | 1.27 | 1.15 | 1.41 | 1.46 | 0.97 | 1.19 | 1.42 | 1.89 | 1.28 | 1.18 | 0.9539 | 0.80(0.35-1.24)  | -0.31(-1.05-0.44) |
| <\$25,000              | 1.3  | 1.02 | 1.61 | 2.26 | 2.04 | 0.38 | 0.75 | 2.23 | 1.04 | 1.88 | 1.68 | 1.11 | 0.918  | 0.86(0.20-1.51)  | -0.19(-1.11-0.74) |
| Race                   |      |      |      |      |      |      |      |      |      |      |      |      |        |                  |                   |
| White Non-Hispanic     | 1.2  | 1.44 | 1.25 | 1.08 | 1.77 | 0.95 | 0.84 | 0.85 | 1.62 | 1.7  | 1.19 | 1.31 | 0.9031 | 1.09(0.53-1.64)  | 0.10(-0.55-0.76)  |
| Black Non-Hispanic     | 0.5  | 0.52 | 0.24 | 1.47 | 0.78 | 0.33 | 1.2  | 1.06 | 0.87 | 0.96 | 3.56 | 0.34 | 0.3915 | 0.69(0.34-1.72)  | -0.15(-0.76-0.46) |
| Multiracial/other race | 3.76 | 3.12 | 2.19 | 2.61 | 2.27 | 1.18 | 2.17 | 1.82 | 0.78 | 3.09 | 1.66 | 2.18 | 0.9283 | 0.58(0.06-1.10)  | -1.58(-4.56-1.40) |
| Hispanic               | 2.8  | 2.28 | 1.52 | 1.75 | 0.15 | 1.98 | 0.4  | 5.9  | 0.83 | 2.1  | 2.34 | 1.96 | 0.1008 | 0.70(0.32-1.72)  | -0.83(-4.39-2.73) |
|                        |      |      |      |      |      |      |      |      |      |      |      |      |        |                  |                   |
| Reflexology            |      |      |      |      |      |      |      |      |      |      |      |      |        |                  |                   |

|                          |       |       |       |       |       |       |       |       |       |       |       |       |        |                  |                      |
|--------------------------|-------|-------|-------|-------|-------|-------|-------|-------|-------|-------|-------|-------|--------|------------------|----------------------|
| <b>Day symptoms</b>      |       |       |       |       |       |       |       |       |       |       |       |       |        |                  |                      |
| ≤2 days/week             | 1.86  | 1.9   | 1.6   | 2.58  | 3.01  | 1.23  | 0.89  | 2.39  | 1.86  | 2.8   | 1.23  | 1.87  | 0.8004 | 1.01(0.23-1.79)  | 0.016(-1.43-1.46)    |
| >2 days/ week            | 1.88  | 1.91  | 1.76  | 2.28  | 1.51  | 1.23  | 1.28  | 0.78  | 1.58  | 2.1   | 1.5   | 1.49  | 0.665  | 0.79(0.26-1.33)  | -0.39(-1.53-0.75)    |
| Throughout the day       | 1     | 1.73  | 1.29  | 1.74  | 1.59  | 1.61  | 1.14  | 0.69  | 1.43  | 1.78  | 0.89  | 1.25  | 0.665  | 1.25(0.45-2.04)  | 0.25(-0.49-0.99)     |
| <b>Night Symptoms</b>    |       |       |       |       |       |       |       |       |       |       |       |       |        |                  |                      |
| ≤2 times/ month          | 4.38  | 3.14  | 1.27  | 2.48  | 4.28  | 1.31  | 0.64  | 2.23  | 2.88  | 3.11  | 2.11  | 2.79  | 0.2192 | 0.64(0.07-1.20)  | -1.59(-4.9-1.76)     |
| 1–3 times/ week          | 1.71  | 2.55  | 2.44  | 3.6   | 1.84  | 1.24  | 1.8   | 1.11  | 2.04  | 3.39  | 2.17  | 0.99  | 0.1295 | 0.58(0.10-1.07)  | -0.71(-1.79-0.36)    |
| ≥4 times/week            | 0.95  | 1.5   | 1.29  | 1.57  | 1.45  | 1.52  | 1.05  | 0.72  | 1.31  | 1.59  | 0.76  | 1.33  | 0.0251 | 1.40(0.63-2.17)  | 0.38(-0.28-1.03)     |
| <b>Age</b>               |       |       |       |       |       |       |       |       |       |       |       |       |        |                  |                      |
| 18-55 Years              | 1.19  | 2.67  | 1.42  | 2.24  | 1.42  | 1.74  | 1.11  | 0.55  | 1.18  | 2.01  | 0.82  | 1.54  | 0.0058 | 1.30(0.51-2.08)  | 0.35(-0.50-1.21)     |
| >55 Years                | 1.59  | 1.09  | 1.31  | 1.33  | 0.89  | 1.56  | 0.83  | 1.51  | 2.01  | 1.82  | 1.44  | 1.06  | 0.1152 | 0.66(0.29-1.04)  | -0.53(-1.34-0.27)    |
| <b>Gender</b>            |       |       |       |       |       |       |       |       |       |       |       |       |        |                  |                      |
| Female                   | 1.35  | 2.28  | 1.86  | 1.68  | 1.9   | 1.85  | 1.27  | 0.99  | 1.78  | 2.5   | 1.31  | 1.58  | 0.048  | 1.18(0.60-1.76)  | 0.24(-0.51-0.10)     |
| Male                     | 1.31  | 0.9   | 0.7   | 2.39  | 1.37  | 0.74  | 0.9   | 0.71  | 0.99  | 0.91  | 0.58  | 0.97  | 0.587  | 0.74(0.12-1.36)  | -0.34(-1.31-0.62)    |
| <b>Income</b>            |       |       |       |       |       |       |       |       |       |       |       |       |        |                  |                      |
| >\$25000                 | 1.32  | 1.48  | 1.16  | 1.49  | 1.16  | 1.78  | 1.24  | 0.84  | 1.49  | 2.13  | 0.92  | 1.15  | 0.6011 | 0.87(0.42-1.33)  | -0.17(-0.82-0.48)    |
| <\$25,000                | 1.6   | 2.01  | 1.21  | 2.52  | 3.86  | 1.17  | 0.9   | 1.26  | 2.15  | 2.26  | 1.75  | 0.54  | 0.1078 | 0.34(0.06-0.62)  | -1.06(-2.08- -0.04)  |
| <b>Race</b>              |       |       |       |       |       |       |       |       |       |       |       |       |        |                  |                      |
| White Non-Hispanic       | 1.47  | 1.28  | 1.51  | 1.76  | 1.74  | 1.68  | 1.25  | 0.64  | 1.42  | 1.76  | 1.04  | 1.38  | 0.7225 | 0.94(0.44-1.44)  | -0.09(-0.83-0.66)    |
| Black Non-Hispanic       | 0.33  | 2.31  | 1.07  | 0.69  | 1.91  | 1.2   | 0.72  | 0.54  | 0.99  | 0.77  | 0.87  | 1.05  | 0.6387 | 3.15(1.20-7.50)  | 0.72(-0.41-1.85)     |
| Multiracial/other race   | 2.39  | 2.11  | 2.18  | 4.65  | 2.43  | 1.06  | 1.84  | 2.62  | 2.05  | 2.63  | 1.99  | 1.54  | 0.895  | 0.644(0.14-1.15) | -0.85(-2.59-0.9)     |
| Hispanic                 | 0.58  | 4.55  | 1.37  | 2.77  | 2     | 1.06  | 0.6   | 1.99  | 1.72  | 2.33  | 0.98  | 1.38  | 0.2378 | 2.36(0.62-5.34)  | 0.79(-0.42-2.0)      |
|                          |       |       |       |       |       |       |       |       |       |       |       |       |        |                  |                      |
| <b>Other CAM therapy</b> |       |       |       |       |       |       |       |       |       |       |       |       |        |                  |                      |
| <b>Day symptoms</b>      |       |       |       |       |       |       |       |       |       |       |       |       |        |                  |                      |
| ≤2 days/week             | 15.68 | 8.54  | 12.85 | 12.38 | 12.72 | 13.03 | 14.36 | 11.7  | 16.34 | 13.7  | 12.78 | 11.79 | 0.0577 | 0.75(0.45-1.06)  | -3.89(-9.35-1.58)    |
| >2 days/ week            | 12.94 | 10.22 | 9.56  | 10.82 | 12.18 | 11.89 | 11.62 | 12.01 | 10.89 | 12.91 | 12.93 | 13.84 | 0.0073 | 1.07(0.75-1.39)  | 0.90(-3.08-4.87)     |
| Throughout the day       | 9.16  | 8.23  | 8.38  | 9.96  | 9.2   | 5.93  | 8.99  | 8.66  | 7.67  | 8.3   | 8.85  | 8.57  | 0.7199 | 0.94(0.72-1.15)  | -0.58(-2.64-1.47)    |
| <b>Night Symptoms</b>    |       |       |       |       |       |       |       |       |       |       |       |       |        |                  |                      |
| ≤2 times/ month          | 19.13 | 8.65  | 10.95 | 10.22 | 7.91  | 12.55 | 11.93 | 12.25 | 10.98 | 19.67 | 19.74 | 9.35  | <.0001 | 0.49(0.26-0.72)  | -9.78(-16.19- -3.36) |
| 1–3 times/ week          | 12.25 | 10.62 | 12.45 | 13.31 | 14.07 | 9.18  | 14.97 | 12.24 | 10.43 | 13.39 | 13.72 | 10.33 | 0.996  | 0.84(0.51-1.17)  | -1.92(-6.29-2.45)    |
| ≥4 times/week            | 9.63  | 8.46  | 8.02  | 9.78  | 9.63  | 7.05  | 9.03  | 9.19  | 8.93  | 8.03  | 8.69  | 9.93  | 0.2066 | 1.03(0.82-1.24)  | 0.30(-1.71-2.31)     |
| <b>Age</b>               |       |       |       |       |       |       |       |       |       |       |       |       |        |                  |                      |
| 18-55 Years              | 11.85 | 10.34 | 9.42  | 11.15 | 10.63 | 8.97  | 11.16 | 10.23 | 9.88  | 10.21 | 10.16 | 9.71  | 0.6147 | 0.82(0.62-1.02)  | -2.14(-4.72 -0.43)   |
| >55 Years                | 8.35  | 7.03  | 7.79  | 8.55  | 9.34  | 6.58  | 8.8   | 9.01  | 8.14  | 9.32  | 10.15 | 10.87 | 0.0014 | 1.30(1.00-1.60)  | 2.52(0.29-4.76)      |



| <b>Gender</b>          |       |       |       |       |       |       |       |       |       |       |       |       |        |                 |                    |
|------------------------|-------|-------|-------|-------|-------|-------|-------|-------|-------|-------|-------|-------|--------|-----------------|--------------------|
| Female                 | 11.74 | 9.35  | 9.66  | 8.98  | 10.01 | 8.25  | 10.05 | 10.61 | 9.56  | 10.16 | 10.15 | 10.12 | 0.0126 | 0.86(0.69-1.03) | -1.62(-3.75-0.52)  |
| Male                   | 9.11  | 7.83  | 8.02  | 12.47 | 10.69 | 7.68  | 10.32 | 8.31  | 8.6   | 9.34  | 10.16 | 10.2  | 0.5318 | 1.12(0.76-1.48) | 1.09(-2.03-4.20)   |
| <b>Income</b>          |       |       |       |       |       |       |       |       |       |       |       |       |        |                 |                    |
| >\$25000               | 10    | 8.89  | 8.17  | 12.29 | 11.9  | 7.1   | 9.37  | 9.93  | 10.65 | 9.3   | 9.52  | 10.17 | 0.4535 | 1.02(0.80-1.23) | 0.17(-1.97-2.31)   |
| <\$25,000              | 10.37 | 11.09 | 10.28 | 8.44  | 9.75  | 7.49  | 11.85 | 11.52 | 7.08  | 9.99  | 12.8  | 10.15 | 0.6127 | 0.98(0.76-1.18) | -0.21(-4.78-4.33)  |
| <b>Race</b>            |       |       |       |       |       |       |       |       |       |       |       |       |        |                 |                    |
| White Non-Hispanic     | 10.44 | 8.87  | 8.47  | 10.39 | 9.8   | 8.59  | 10.1  | 10.64 | 9.96  | 10.53 | 10.4  | 10.93 | 0.0032 | 1.05(0.86-1.23) | 0.48(-1.47-2.43)   |
| Black Non-Hispanic     | 8.11  | 7.76  | 6.37  | 10.36 | 11.27 | 5.32  | 11.06 | 5.99  | 5.86  | 8.36  | 6.82  | 4.92  | 0.3021 | 0.61(0.05-1.17) | -3.19(-9.03-2.65)  |
| Multiracial/other race | 14.44 | 9.37  | 16.9  | 10.67 | 10.4  | 10.35 | 15.98 | 9.04  | 8.14  | 8.14  | 12.86 | 11.1  | 0.9582 | 0.77(0.41-1.12) | -3.35(-9.32-2.63)  |
| Hispanic               | 11.87 | 9.17  | 10.63 | 10.66 | 12.35 | 6.69  | 6.8   | 8.87  | 8.72  | 8.71  | 9.08  | 9.2   | 0.9589 | 0.78(0.25-1.30) | -2.66(-10.03-4.71) |

\*Weighted percentages
