# Supplementary material
Source: MDPI journal article supplement (https://www.mdpi.com/2673-3986/4/1/10)

Figure S1: Trend in the use of at least one CAM by Day symptoms, Night symptoms, Age, Gender, Income and Race

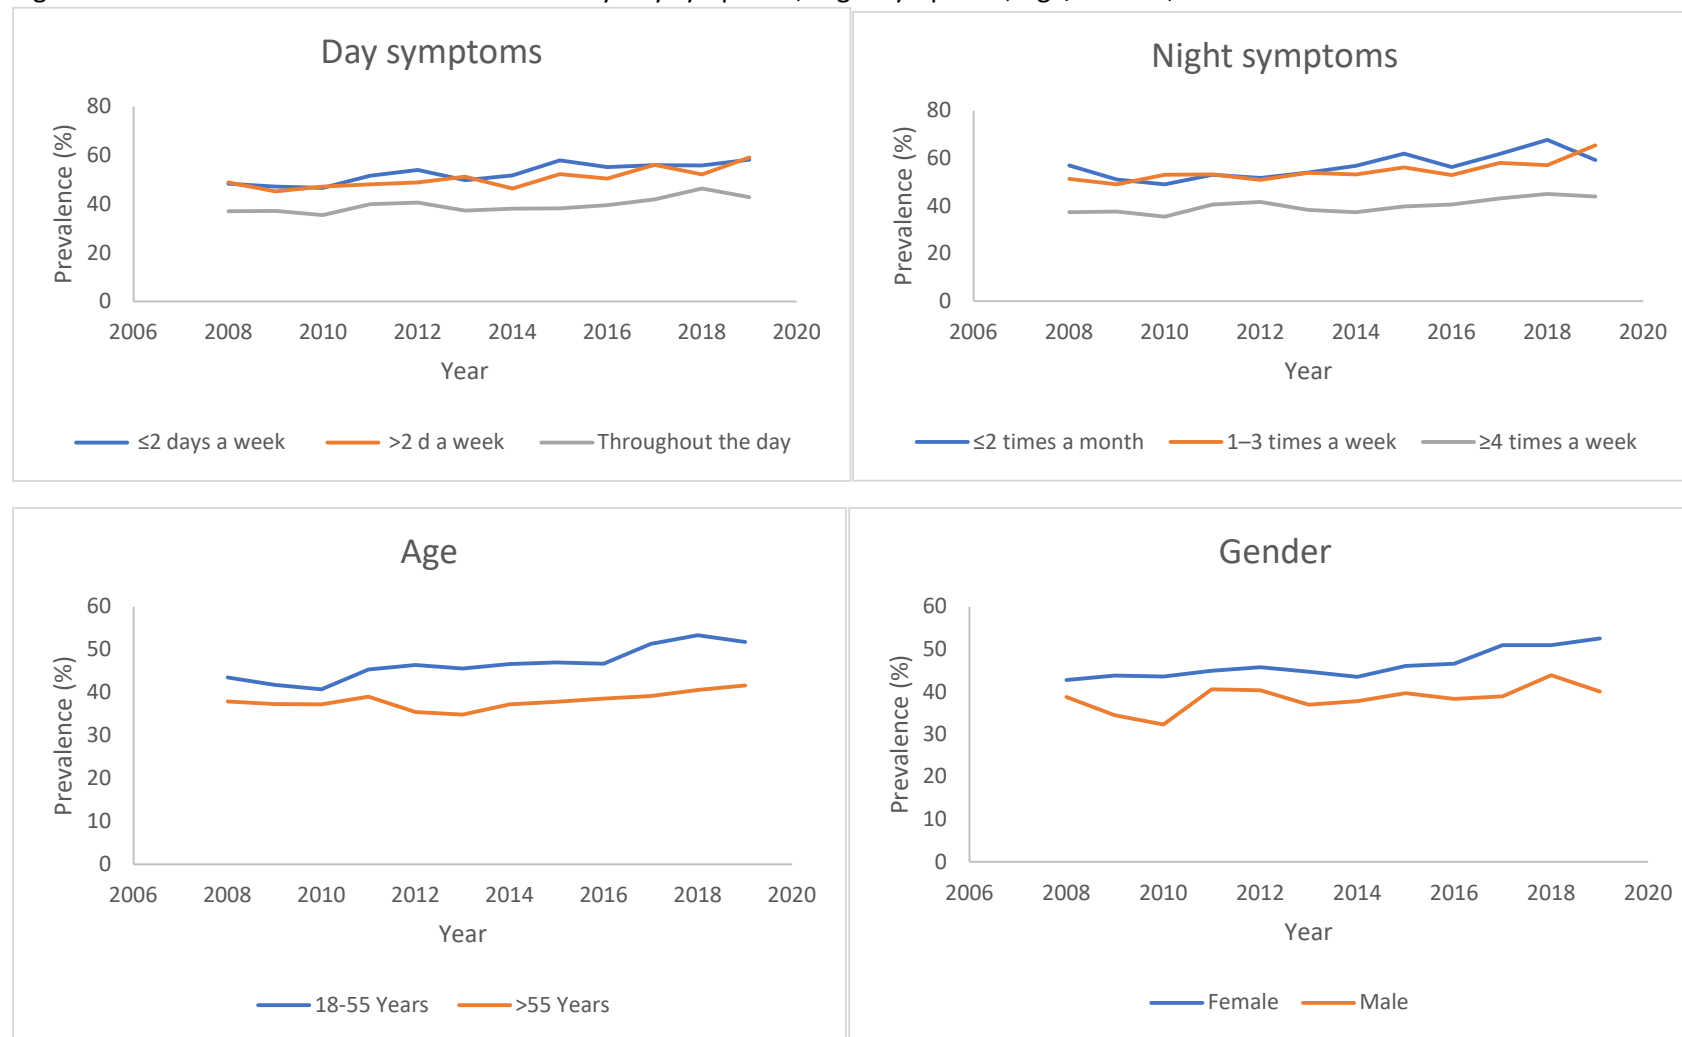

Income

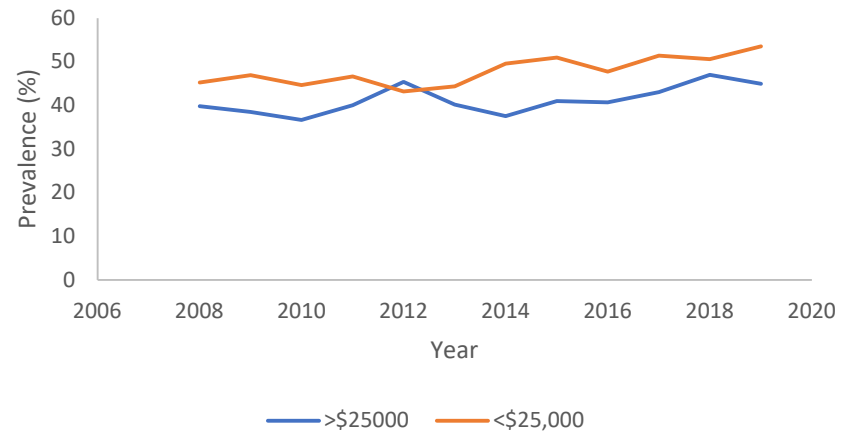

Race

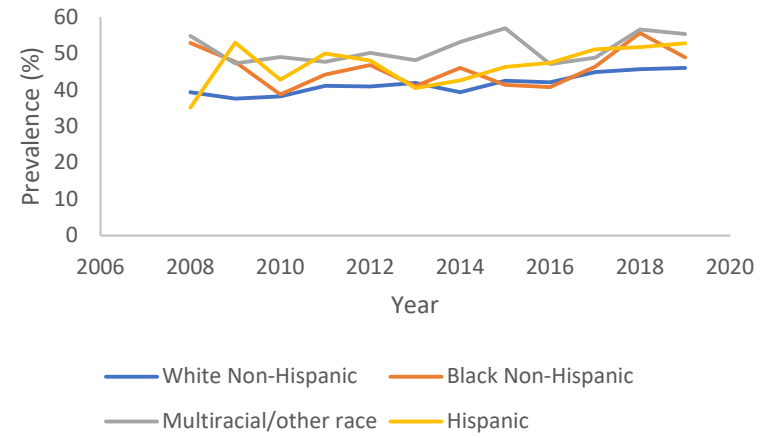

Supplement: s1 [file s1]
